# Supplementary material
Source: PubMed Central journal article supplement (PMC3427119)
Supplement: 1121096109_sapp.pdf [file 1121096109_sapp.pdf]

## Supporting Information

### Rapid divergence and expansion of the X chromosome in papaya

Andrea R. Gschwend<sup>a</sup>, Qingyi Yu<sup>b,c,1</sup>, Eric J. Tong<sup>c</sup>, Fanchang Zeng<sup>a</sup>, Jennifer Han<sup>a</sup>, Robert VanBuren<sup>a</sup>, Rishi Aryal<sup>a</sup>, Deborah Charlesworth<sup>d</sup>, Paul H. Moore<sup>c</sup>, Andrew H. Paterson<sup>c</sup>, Ray Ming<sup>a,1</sup>

<sup>a</sup> Department of Plant Biology, University of Illinois at Urbana-Champaign, Urbana, IL 61801

<sup>b</sup> Texas AgriLife Research Center, Department of Plant Pathology and Microbiology, Texas A&M University, Weslaco, TX 78596

<sup>c</sup> Hawaii Agriculture Research Center, Kunia, HI 96759

<sup>d</sup> Institute of Evolutionary Biology, University of Edinburgh, Edinburgh EH9 3JT, United Kingdom

<sup>e</sup> Plant Genome Mapping Laboratory, University of Georgia, Athens, GA 30606

<sup>1</sup>To whom correspondence should be addressed. E-mail: [rming@life.illinois.edu](mailto:rming@life.illinois.edu);

[QYu@ag.tamu.edu](mailto:QYu@ag.tamu.edu)

## SI Appendix

**Synteny analysis.** A dot plot, cycle schematic, and sequence alignment detected 3 syntenic regions between the papaya X-specific BACs and the corresponding *V. monoica* BACs (Fig. S2a and S2b). The first region (syntenic region 1), corresponding to *V. monoica* BACs MN13O12-MN74M10 and papaya Ctg11941-SH55B21, is located in the region between border A (at the left of the X physical map and the gap in the X physical map, which could not be filled using chromosome walking, due to its repetitive nature (Fig. S4); this region is 402kb larger (45%) in papaya (Fig. S3a and Table S12). The second region of synteny (syntenic region 2), corresponds to *V. monoica* BACs MN67D07-MN20D10 and papaya BACs SH54M13-SH49A07, which span a region from the aforementioned gap to the region just inside border B of the papaya X physical map; this region is 320kb larger (56%) in papaya. Syntenic region 3 corresponds to *V. monoica* BAC MN81D10 and the papaya BAC SH86B16, which spans border B of the X-specific region, the first 80kb falling within the sex-specific region and the last 102kb outside this region, into an area that is homologous with the Y<sup>h</sup> chromosome (17). This syntenic region is 1.4kb (5%) larger in *V. monoica* than papaya. Overall, the syntenic papaya X-specific region is 721kb larger than *V. monoica* (i.e. it has additional sequence equal to 48% of the *V. monoica* size). When comparing the papaya autosomal BAC DM105M02 and its *V. monoica* homolog, BAC MN15I14, a single syntenic region was seen, although the *V. monoica* sequence is 62kb longer (Fig. S3b and Table S12).

**Sequence expansion.** Five X-specific regions (blocks) have longer sequences in papaya than in *V. monoica* (Fig. 1c and Table S5). Blocks 1-3 are located in syntenic region 1. Block 1, which corresponds to *V. monoica* BAC MN13O12 and papaya contigs Ctg11941-Ctg08318, is 64 kb (32.8%) larger in papaya. The second block, corresponding to *V. monoica* BAC MN82C19 and papaya BAC SH80F18, is also larger in papaya (by a total of 178 kb, or 57.1% expansion). Block 3, corresponding to *V. monoica* BAC MN96C09 and papaya BAC SH79M13 and SH55B21 has the greatest size difference in syntenic region 1, being a total of 251 kb (73.5%) larger in papaya. Blocks 4 and 5 correspond to syntenic region 2. Block 4, which corresponds to *V. monoica* BAC MN67D07 and papaya BAC SH54M13, is 37kb larger in papaya (56.1%). Block 5, which corresponds to *V. monoica* BACs MN25J07 and MN20D10 and papaya BACs SH53E18 and SH49A07, is 266 kb larger (46.9%) in papaya compared to *V. monoica*.

**BAC sequence re-ordering.** Two *V. monoica* BACs, MN15I14 and MN20D10, which are in 4 and 5 contigs, respectively, were both re-ordered after being aligned to the corresponding completed papaya BACs. This resulted in some changed X-specific (Table S2) and autosomal gene locations (Table S3) from those of the BACs submitted to NCBI, which were unordered upon submission. Refer to Table S11 for a complete list of BACs and NCBI accession numbers.

**Gene prediction.** Genes were predicted in *V. monoica* BACs MN96C09-MN20D10 and SH79M13-SH49A07, which correspond to regions that fall within the non-recombining HSY-specific region in papaya (Table S1). The other *V. monoica* and papaya BACs not analyzed here correspond either to regions that lie on or beyond Borders A and B defined by the HSY physical map. Genes were annotated in the 703 kb of *V. monoica* sequence, and the 1,820 kb of papaya X sequence corresponding to the BACs mentioned above.

**Divergence time analysis.** Ten genes are shared between *V. monoica*, the papaya X, and the papaya HSY. Divergence time analyses were performed on seven of the 10 shared genes (Table S9). Three genes, CpXY<sup>h</sup>20, CpXY<sup>h</sup>29, and CpXY<sup>h</sup>37, were excluded from the analysis due to incomplete sequences of their introns. The  $K_{sil}$  values range from 0.132-0.215 between *V. monoica* and the papaya X and 0.141-0.215 between *V. monoica* and the papaya HSY. CpXY<sup>h</sup>4, CpXY<sup>h</sup>8, and CpXY<sup>h</sup>12 are pseudogenes, but are still suitable for estimating divergence times from silent site differences. The *V. monoica* copy of CpHY<sup>h</sup>23 is truncated compared to the papaya copies, but is still transcribed and contains a complete conserved domain, and so we included silent sites in the portion of sequence that is available. Divergence times were also estimated for 3 of the 5 autosomal gene pairs. Expansion within the introns of the *V. monoica* copy of VmA2 prevented an estimate of  $K_{sil}$  for this gene and CYC-b is a single exon gene, so  $K_{sil}$  analyses could not be performed. The  $K_{sil}$  values for the remaining three autosomal genes suggest divergence times ranging from 22.4-24.1 MYA.

**Repetitive element content.** The larger size of the papaya X-specific region is due to retrotransposon insertions and duplications. About 60% of the *V. monoica* sequences consist of repetitive elements for both the BACs corresponding to the papaya X-specific and to the autosomal regions (Table S6), whereas the papaya X-specific region has an average of 65.4% of repetitive elements, a 5.4% increase, mainly due to an increase of retroelements, specifically long terminal repeat (LTR) elements. Figure 1a depicts the papaya X region in which these duplications are highly abundant. Two regions of *V. monoica* sequence have extensive duplications of *Gypsy* LTRs in papaya, occupying the gap in synteny between syntenic regions 1 and 2 in *V. monoica* and the papaya X-specific region (Fig. S3a).

***V. monoica* genome size.** The genome size of *Vasconcellea monoica*, Accession# HCAR171, was determined through flow cytometry by the Flow Cytometry and Imaging Core Laboratory at the Virginia Mason Research Center, Seattle, WA, following the protocol reported by VanBuren et al. (2011). Internal standards of chicken red blood cells (2.5 pg/2C), *Glycine Max* (2.35 pg/2C), *Oryza sativa* cv Nipponbare (0.96 pg/2C), and *Arabidopsis thaliana* (0.36 pg/2C) were utilized to determine genome size.

## References

VanBuren R, et al. (2011) Longli is not a hybrid of Longan and Lychee as revealed by genome size analysis and trichome morphology. *Trop Plant Biol* 4:228-236.

Na J-K, et al. (2012) Rapid expansion of the hermaphrodite specific region of Y<sup>h</sup> chromosome (HSY) in papaya. *BMC Genomics* (in press).

Ming R, et al. (2008) The draft genome of the transgenic tropical fruit tree papaya (*Carica papaya* Linnaeus) *Nature* 452:991-996.

## Supplemental Figures

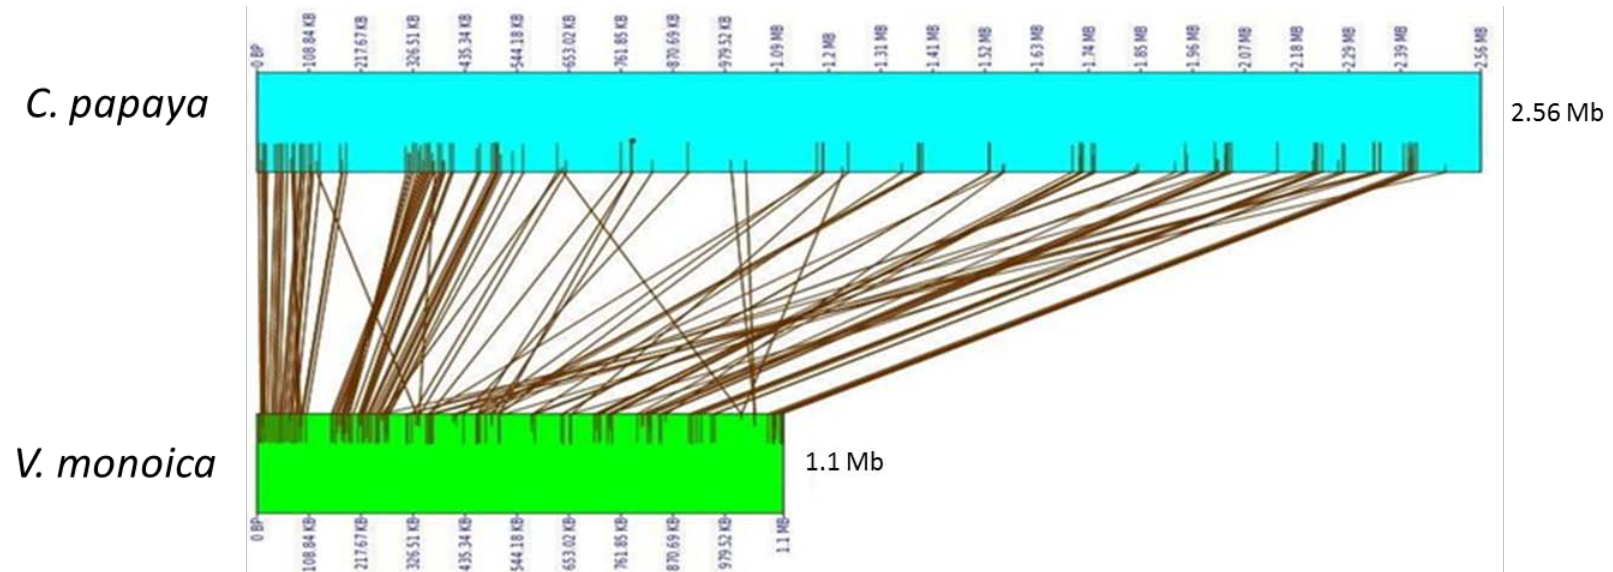

**Fig. S1.** The alignment of the papaya X-specific pseudomolecule and the corresponding *V. monoica* pseudomolecule. Brown lines denote alignable regions, and the locations of these regions in the pseudomolecules.

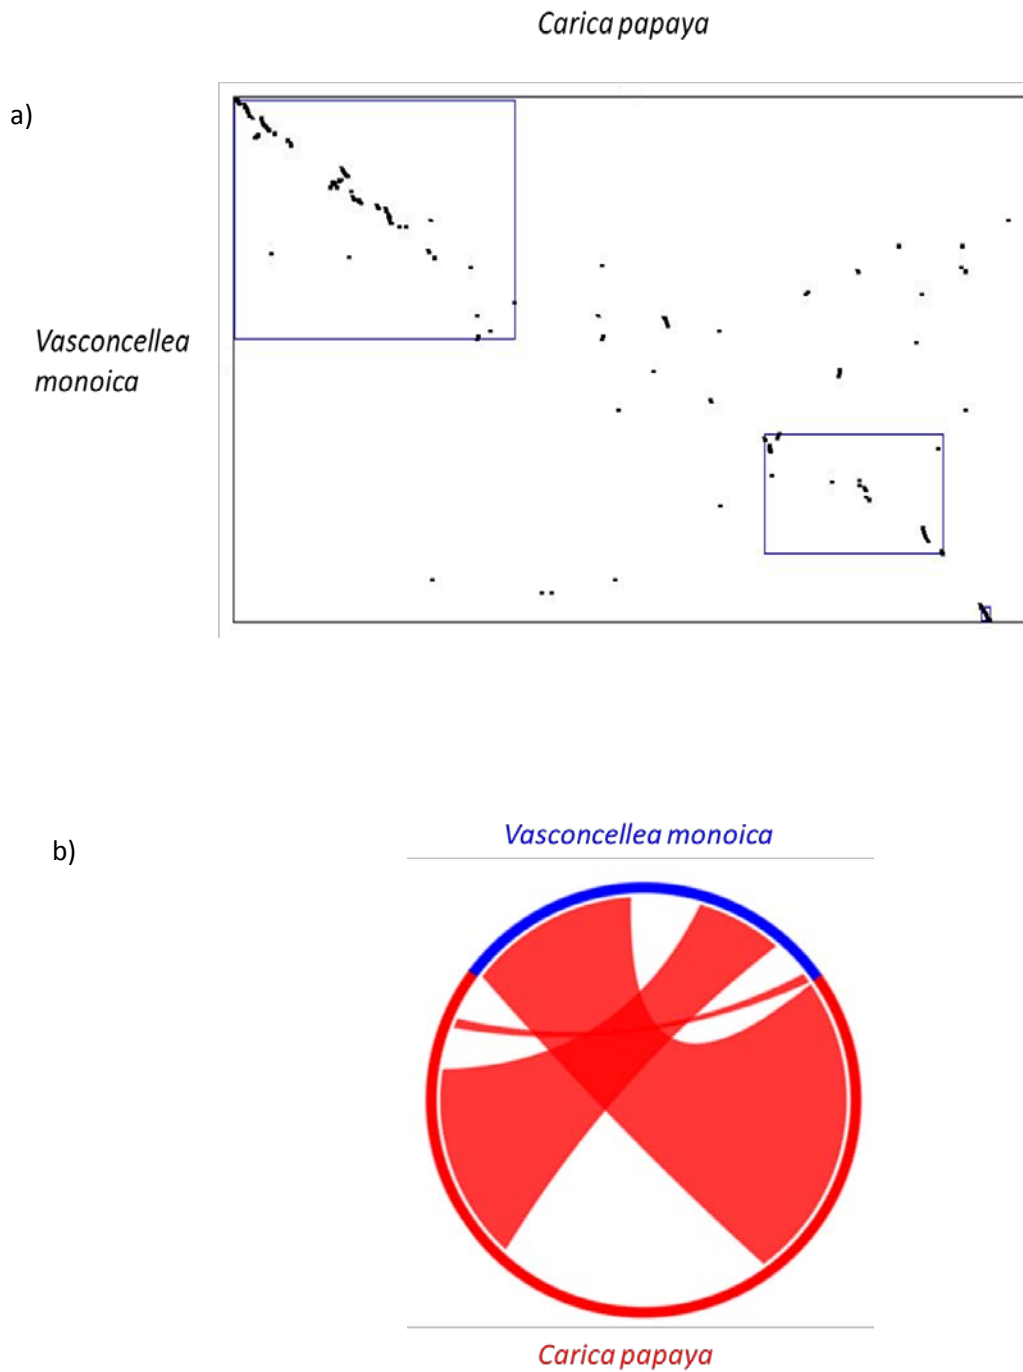

**Fig. S2.** The syntenic regions shared between the X-specific region in *C. papaya* and the corresponding regions of *V. monoica*. (A) Dot plot alignment map, with boxes denoting the three syntenic regions. (B) Cycle schematic view with the three syntenic regions represented.

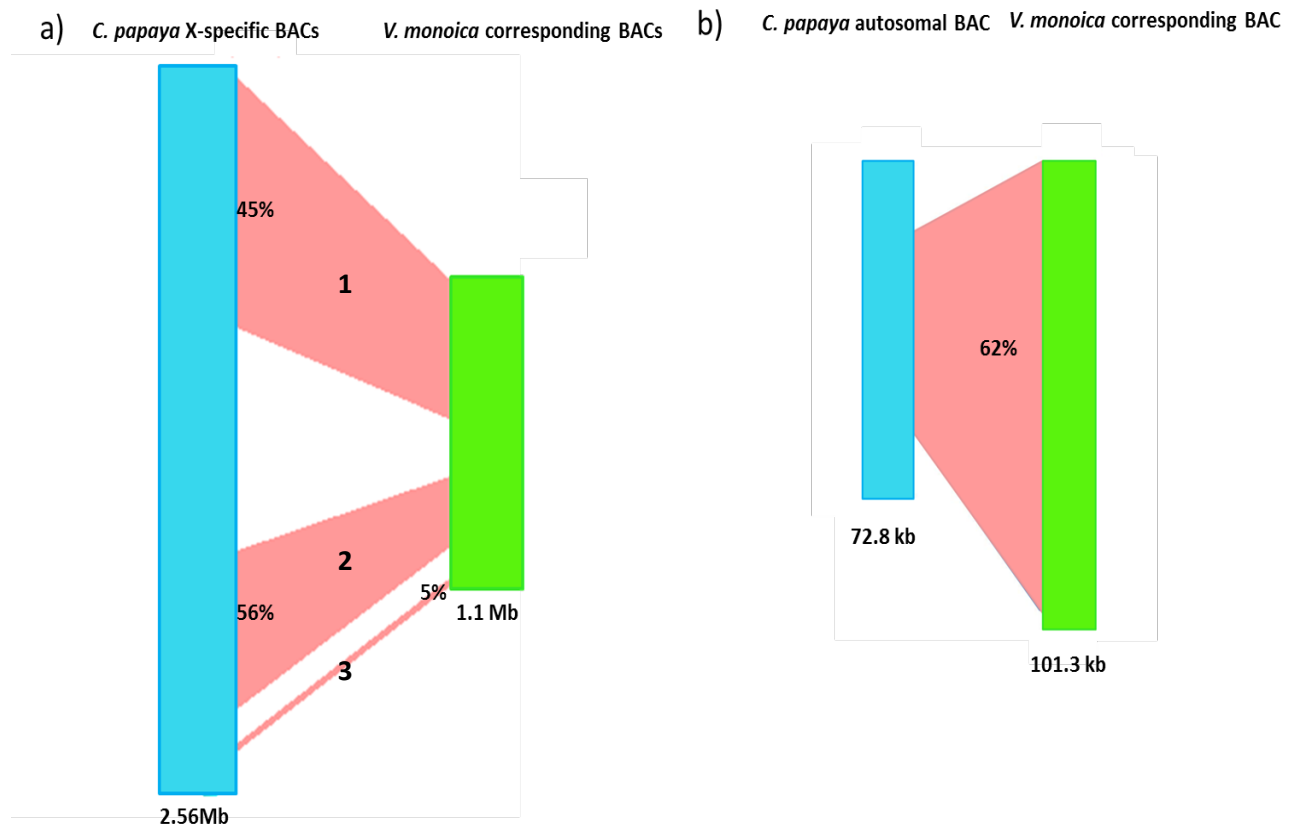

**Fig. S3.** Size differences in the syntenic regions of *C. papaya* and *V. monoica*. (a) Syntenic regions of the papaya X-specific pseudomolecule compared with the corresponding *V. monoica* pseudomolecule. (b) The syntenic region of one *V. monoica* autosomal BAC compared to its corresponding papaya autosomal BAC.

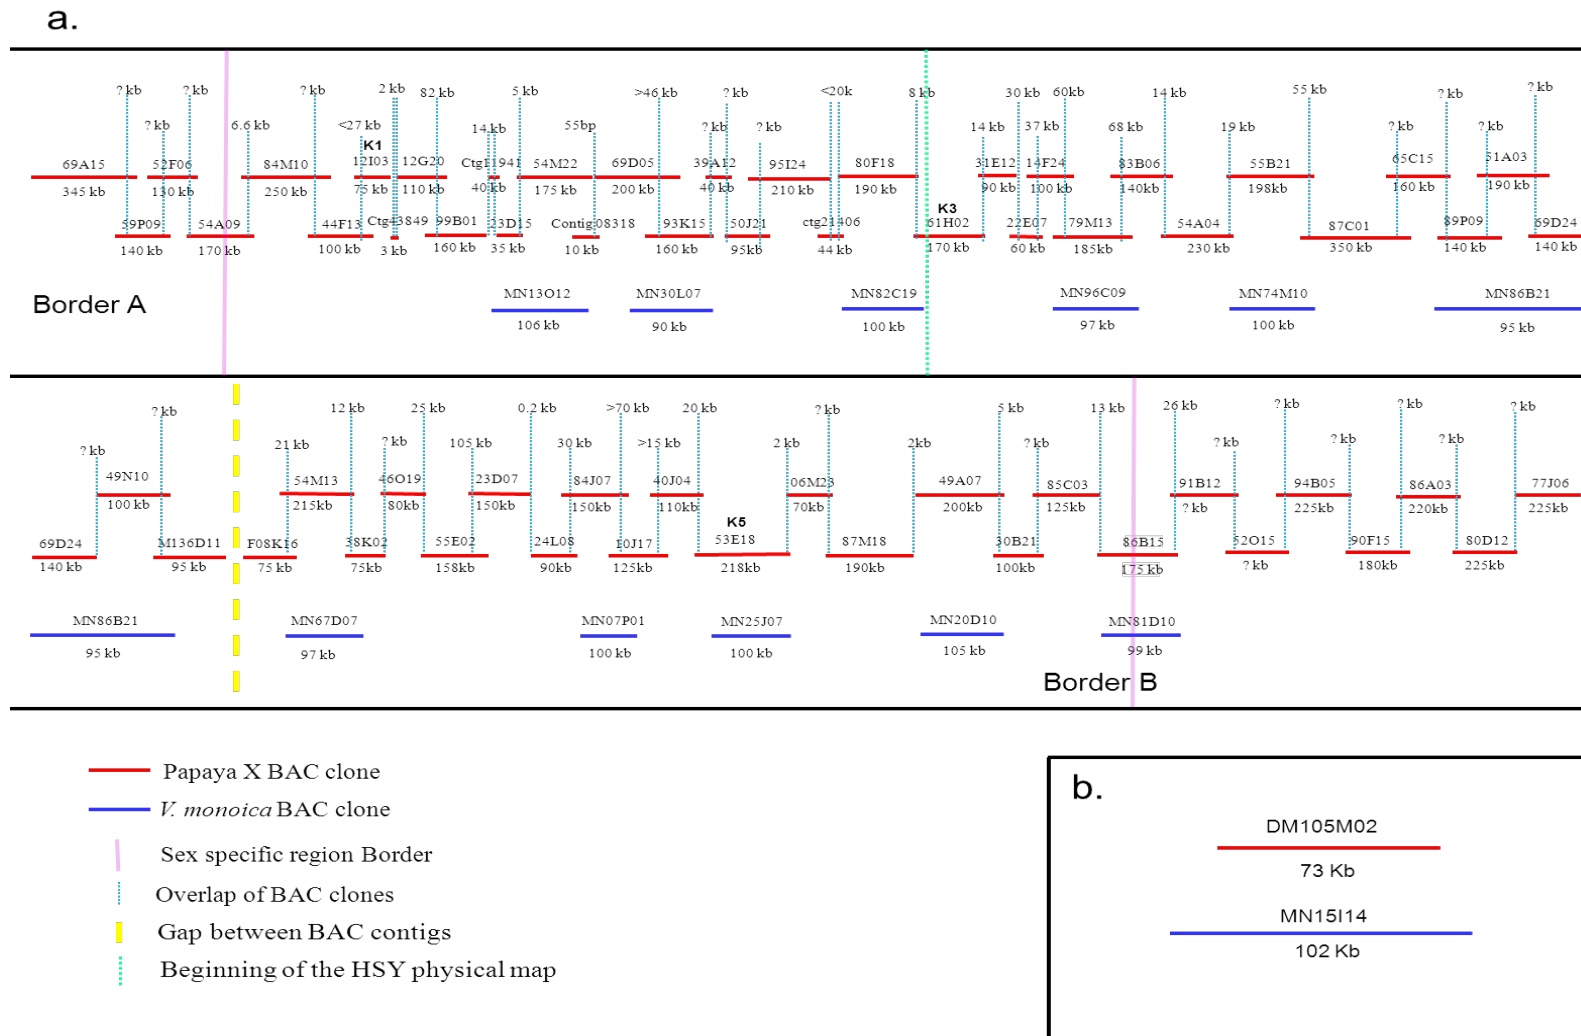

**Fig. S4.** Physical map locations of the *C. papaya* and *V. monoica* BACs. (A) The papaya X physical map published by Na et al. (2012) and the relative positions of the *V. monoica* BACs carrying homologous sequences. (B) The papaya autosomal BAC with the corresponding *V. monoica* BAC.



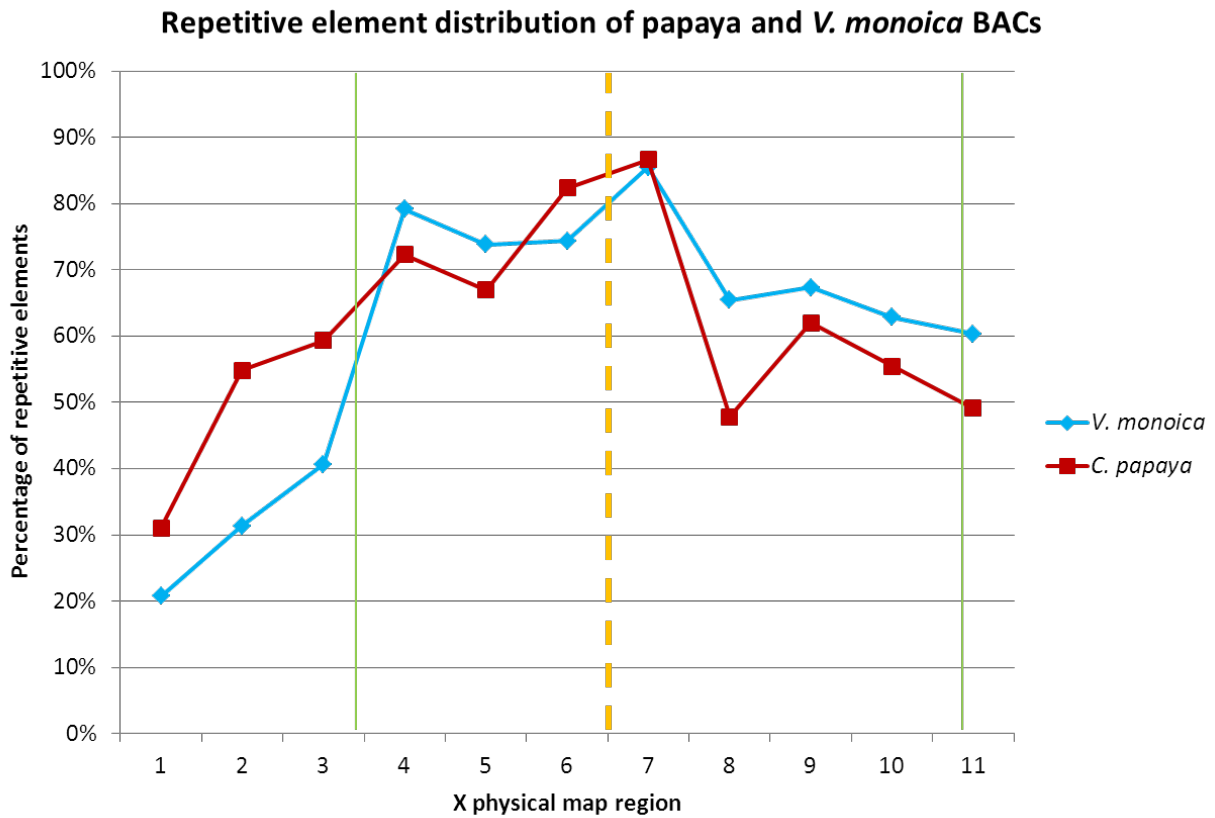

**Fig. S5.** The distribution of repetitive elements surrounding the gap on the papaya X physical map in both *C. papaya* and *V. monoica* is an indication of a conserved centromeric location between the two species. The vertical green lines represent the borders of the fully sex-specific region of the papaya X, and the dashed yellow vertical line represents the location of the gap in the X physical map.

## Supplemental Tables

**Table S1. Size and positions of the *V. monoica* BACs and corresponding *C. papaya* X BACs in the pseudomolecule used for the alignment, synteny, and repeat analyses.**

| BAC Order | <i>V. monoica</i> BACs | Size (bp) | Position on <i>V. monoica</i> pseudomolecule (kb) | Corresponding <i>C. papaya</i> X BACs   | Size (bp) | Position on <i>C. papaya</i> X pseudomolecule (kb) |
|-----------|------------------------|-----------|---------------------------------------------------|-----------------------------------------|-----------|----------------------------------------------------|
| 1         | MN13O12                | 106,282   | 0-106                                             | Ctg11941_SH23D15_SH54M22_Ctg08318       | 185,988   | 1-186                                              |
| 2         | MN30L07                | 90,139    | 106-199                                           | SH95K15                                 | 185,675   | 186-376                                            |
| 3         | MN82C19                | 100,125   | 199-299                                           | SH80F18                                 | 183,386   | 376-559                                            |
| 4         | MN96C09                | 96,693    | 299-396                                           | SH79M13                                 | 153,799   | 559-713                                            |
| 5         | MN74M10                | 99,940    | 396-496                                           | SH55B21                                 | 198,483   | 713-911                                            |
| 6         | MN86B21                | 94,895    | 496-591                                           | SH65C15_SH50M24_SH51A03_SH69D24_M136D11 | 572,951   | 911-1,484                                          |
| 7         | MN67D07                | 108,986   | 591-699                                           | SH54M13                                 | 216,367   | 1,484-1,701                                        |
| 8         | MN07P01                | 97,045    | 699-797                                           | SH84J07                                 | 222,899   | 1,701-1,924                                        |
| 9         | MN25J07                | 100,458   | 797-897                                           | SH53E18                                 | 252,668   | 1,924-2,176                                        |
| 10        | MN20D10                | 104,999   | 897-1,002                                         | SH49A07                                 | 203,300   | 2,176-2,379                                        |
| 11        | MN81D10                | 98,788    | 1,002-1,101                                       | SH86B15                                 | 182,222   | 2,379-2,561                                        |
|           | Total length           | 1,098,350 |                                                   |                                         | 2,558,338 |                                                    |

**Table S2. List of *V. monoica* (Vm) and *C. papaya* (Cp) genes located on BACs corresponding to the papaya X-specific region in the order they appear on the papaya X physical map.**

| Species/Sex chromosome | Gene Symbol                          | Putative Function                             | Number of exons |     |                   | Coding Sequence Length |      |                   | Intron Length |       |                   | Autosome Homolog |                 |                         | BAC      |                        |                  |          |               |                  |          |              |                  |          |  |  |  |
|------------------------|--------------------------------------|-----------------------------------------------|-----------------|-----|-------------------|------------------------|------|-------------------|---------------|-------|-------------------|------------------|-----------------|-------------------------|----------|------------------------|------------------|----------|---------------|------------------|----------|--------------|------------------|----------|--|--|--|
|                        |                                      |                                               | Vm              | CpX | CpHS <sub>Y</sub> | Vm                     | CpX  | CpHS <sub>Y</sub> | Vm            | CpX   | CpHS <sub>Y</sub> | Cp Linkage Group | Cp super-contig | Vm whole genome support | Position | ID                     | Accession Number | Position | ID            | Accession Number | Position | ID           | Accession Number |          |  |  |  |
|                        |                                      |                                               |                 |     |                   |                        |      |                   |               |       |                   |                  |                 |                         | Vm       |                        |                  | CpX      |               |                  | CpHSY    |              |                  |          |  |  |  |
| Vm                     | VmX1                                 | uncharacterized protein                       | 1               |     |                   | 217                    |      |                   | NA            |       |                   |                  | 1               | 123                     | +        | 7537-7755              | MN96C09          | JN088508 |               |                  |          |              |                  |          |  |  |  |
| Vm                     | VmX2                                 | ---NA---                                      | 1               |     |                   | 888                    |      |                   | NA            |       |                   |                  |                 |                         | +        | 60091-60978            | MN96C09          | JN088508 |               |                  |          |              |                  |          |  |  |  |
| CpX                    | CpX-10                               | ---NA---                                      |                 | 2   |                   |                        | 432  |                   |               | 532   |                   |                  |                 |                         |          |                        |                  |          | 51828-52791   | SH79M13          | AC239204 |              |                  |          |  |  |  |
| CpX                    | CpX-11                               | ---NA---                                      |                 | 1   |                   |                        | 207  |                   |               | NA    |                   |                  |                 |                         |          |                        |                  |          | 58107-58313   | SH79M13          | AC239204 |              |                  |          |  |  |  |
| Vm, CpX, CpHSY         | CpXY <sup>h</sup> 5                  | 4-nitrophenylphosphatase                      | 8               | 8   | 8                 | 829                    | 807  | 816               | 2490          | 2444  | 2448              |                  |                 |                         | +        | 68216-71534            | MN96C09          | JN088508 | 66241-69491   | SH79M13          | AC239204 | 95427-98690  | SH69E13          | AC238619 |  |  |  |
| Vm*, CpX, CpHSY        | CpXY <sup>h</sup> 8                  | SYN4 (SISTER CHROMATID COHESION 1 PROTEIN 4)  | 14              | 15  | 15                | 3630                   | 3618 | 3612              | 14247         | 10486 | 9256              |                  |                 |                         | +        | 13491-31367            | MN74M10          | JN088503 | 97208-111312  | SH55B21          | FJ429367 | 73441-86309  | SH81012          | AC239165 |  |  |  |
| CpX                    | PCpX-4                               | ---NA---                                      |                 | 1   |                   |                        | 352  |                   |               | NA    |                   |                  |                 |                         |          |                        |                  |          | 65772-66123   | SH51A03          | AC238603 |              |                  |          |  |  |  |
| CpX, CpHSY             | PY <sup>h</sup> CpXY <sup>h</sup> 22 | Vps51/Vps67 family protein                    |                 | 6   | 5                 |                        | 3240 | 3045              |               | 16497 | 16473             |                  |                 |                         | +        |                        |                  |          | 178754-180952 | SH51A03          | AC238603 | 6062-25579   | SH23L24          | AC238593 |  |  |  |
| CpX, CpHSY             | PXY <sup>h</sup> CpXY <sup>h</sup> 1 | universal stress protein (USP) family protein |                 | 4   | 4                 |                        | 852  | 840               |               | 37086 | 34346             |                  |                 |                         |          |                        |                  |          | 69753-107690  | SH69D24          | AC239162 | 57117-92302  | SH53G04          | AC238607 |  |  |  |
| CpX, CpHSY             | PY <sup>h</sup> CpXY <sup>h</sup> 23 | Hypothetical protein                          |                 | 1   | 1                 |                        | 339  | 326               |               | NA    | NA                |                  |                 |                         |          |                        |                  |          | 86822-87160   | SH69D24          | AC239162 | 71268-71593  | SH53G04          | AC238607 |  |  |  |
| CpX, CpHSY             | CpXY <sup>h</sup> 11                 | PWWP domain-containing protein                |                 | 1   | 1                 |                        | 3126 | 3111              |               | NA    | NA                |                  |                 |                         |          |                        |                  |          | 110760-113885 | SH69D24          | AC239162 | 95120-98230  | SH53G04          | AC238607 |  |  |  |
| Vm                     | VmX3**                               | ---NA---                                      | 3               |     |                   | 471                    |      |                   | 372           |       |                   |                  |                 |                         | +        | 4398-5241, 53985-54827 | MN86B21          | JN088507 |               |                  |          |              |                  |          |  |  |  |
| Vm*, CpX, CpHSY        | CpXY <sup>h</sup> 12                 | ADP-ribosylation factor A1B                   | 4               | 5   | 6                 | 461                    | 552  | 558               | 2928          | 6244  | 7526              |                  |                 |                         | +        | 57666-61054            | MN67D07          | JN088502 | 159681-166476 | SH54M13          | AC238609 | 32224-40307  | SH81O12          | AC239165 |  |  |  |
| Vm, CpX, CpHSY         | CpXY <sup>h</sup> 20                 | MBD9; DNA binding / methyl-CpG binding        | 10              | 11  | 11                | 6568                   | 6612 | 6609              | 31662         | 22522 | 37067             |                  |                 |                         | +        | 6198-44427             | MN07P01          | JN88494  | 166625-195755 | SH84J07          | AC238629 | 91204-134880 | SH88A07          | AC239168 |  |  |  |

| Species/Sex chromosome       | Gene Symbol         | Putative Function                                                                  | Number of exons |     |                   | Coding Sequence Length |      |                   | Intron Length |       |                   | Autosome Homolog |                 |                         | BAC         |            |                  |               |         |                  |               |         |                  |
|------------------------------|---------------------|------------------------------------------------------------------------------------|-----------------|-----|-------------------|------------------------|------|-------------------|---------------|-------|-------------------|------------------|-----------------|-------------------------|-------------|------------|------------------|---------------|---------|------------------|---------------|---------|------------------|
|                              |                     |                                                                                    | Vm              | CpX | CpHS <sub>Y</sub> | Vm                     | CpX  | CpHS <sub>Y</sub> | Vm            | CpX   | CpHS <sub>Y</sub> | Cp Linkage Group | Cp super-contig | Vm whole genome support | Position    | ID         | Accession Number | Position      | ID      | Accession Number | Position      | ID      | Accession Number |
|                              |                     |                                                                                    |                 |     |                   |                        |      |                   |               |       |                   |                  |                 |                         | Vm          |            |                  | CpX           |         |                  | CpHSY         |         |                  |
| Vm <sup>†</sup> , CpX, CpHSY | CpXY <sup>h27</sup> | protein kinase                                                                     | 13              | 20  | 20                | 1683                   | 2091 | 2088              | 3261          | 9032  | 88988             |                  |                 | +                       | 82044-86987 | MN86B21    | JN088507         | 19577-30698   | SH53E18 | EF661026         | 34767-45842   | SH64O06 | AC239158         |
| Vm                           | VmX4                | ---NA---                                                                           | 1               |     |                   | 270                    |      |                   |               |       |                   |                  |                 | +                       | 49607-49876 | MN07P01    | JN88494          |               |         |                  |               |         |                  |
| Vm                           | VmX5                | unnamed protein                                                                    | 8               |     |                   | 3135                   |      |                   | 3151          |       |                   |                  | 9               | 1                       | +           | 8023-14308 | MN25J07          | JN088499      |         |                  |               |         |                  |
| Vm                           | VmX6                | cation/H(+) antiporter                                                             | 3               |     |                   | 2307                   |      |                   | 220           |       |                   | unknown, 9,9     | 381, 1, 476     | +                       | 19361-21887 | MN25J07    | JN088499         |               |         |                  |               |         |                  |
| Vm*, CpX, CpHSY              | CpXY <sup>h29</sup> | N-acetylglucosamine-phosphate mutase                                               | 9               | 9   | 7                 | 1574                   | 1686 | 1362              | 27958         | 32248 | 19588             |                  |                 | +                       | 50651-92897 | MN25J07    | JN088499         | 86982-119229  | SH53E18 | EF661026         | 87673-107260  | SH59O17 | AC239154         |
| CpX, CpHSY                   | CpXY <sup>h30</sup> | NUC (nutcracker); nucleic acid binding / transcription factor/ zinc ion binding    |                 | 1   | 1                 |                        | 209  | 312               |               | NA    | NA                |                  |                 |                         |             |            |                  | 92981-93289   | SH53E18 | EF661026         | 92916-93227   | SH59O17 | AC239154         |
| Vm                           | VmX7                | hypothetical protein                                                               | 6               |     |                   | 963                    |      |                   | 1611          |       |                   |                  |                 | +                       | 64502-67075 | MN25J07    | JN088499         |               |         |                  |               |         |                  |
| Vm                           | VmX8                | ---NA---                                                                           | 1               |     |                   | 264                    |      |                   | NA            |       |                   |                  |                 | +                       | 74529-74792 | MN25J07    | JN088499         |               |         |                  |               |         |                  |
| Vm                           | VmX9                | hypothetical protein                                                               | 3               |     |                   | 423                    |      |                   | 1638          |       |                   |                  |                 | +                       | 81854-83914 | MN25J07    | JN088499         |               |         |                  |               |         |                  |
| Vm, CpX, CpHSY               | CpXY <sup>h34</sup> | metal-dependent phosphohydrolase HD domain-containing protein                      | 18              | 19  | 18                | 1419                   | 1413 | 1413              | 16386         | 7477  | 7339              |                  |                 | +                       | 4950-22754  | MN20D10    | JN088497         | 155987-164916 | SH49A07 | AC239150         | 151017-159769 | SH75H06 | AC238771         |
| Vm, CpX, CpHSY               | CpXY <sup>h35</sup> | calcium homeostasis regulator-like protein<br>CHoR1                                | 3               | 3   | 3                 | 819                    | 819  | 819               | 801           | 873   | 883               |                  |                 | +                       | 28936-30555 | MN20D10    | JN088497         | 150401-152093 | SH49A07 | AC239150         | 145436-147128 | SH75H06 | AC238771         |
| Vm, CpX, CpHSY               | CpXY <sup>h36</sup> | formate dehydrogenase                                                              | 6               | 6   | 6                 | 1149                   | 1149 | 1149              | 1627          | 1496  | 1497              |                  |                 | +                       | 31040-33815 | MN20D10    | JN088497         | 147308-149953 | SH49A07 | AC239150         | 142343-144988 | SH75H06 | AC238771         |
| Vm*, CpX, CpHSY              | CpXY <sup>h37</sup> | ERA1 (ENHANCED RESPONSE TO ABA 1); farnesyltransferase/protein farnesyltransferase | 14              | 14  | 14                | 1299                   | 1299 | 1299              | 17761         | 5840  | 5859              |                  |                 | +                       | 40595-59654 | MN20D10    | JN088497         | 100081-107219 | SH49A07 | AC239150         | 95081-102238  | SH75H06 | AC238771         |

\* Vm pseudogene

\*\* Gene is duplicated

† Gene is truncated

**Table S3. List of *V. monoica* (Vm) and *C. papaya* (Cp) genes located on the papaya autosomal BAC and corresponding *V. monoica* BAC.**

| Species | Gene Symbol | Putative Function                  | Number of Exons |    | Coding Sequence Length |      | Intron length |       | BAC         |         |                         |             |          |                         |
|---------|-------------|------------------------------------|-----------------|----|------------------------|------|---------------|-------|-------------|---------|-------------------------|-------------|----------|-------------------------|
|         |             |                                    | Vm              | Cp | Vm                     | CpA  | Vm            | CpA   | Position    | ID      | Gene Bank Accession No. | Position    | ID       | Gene Bank Accession No. |
|         |             |                                    |                 |    |                        |      |               |       | Vm          |         |                         | Cp          |          |                         |
| Vm, Cp  | CYC-b       | capsanthin capsorubin synthase     | 1               | 1  | 1485                   | 1485 | 0             | 0     | 1923-3407   | MN15I14 | JN88496                 | 16714-18198 | AM105M02 | GQ478572                |
| Vm, Cp  | VmA2        | uncharacterized protein            | 10              | 10 | 1290                   | 1209 | 47948         | 16040 | 28786-76733 | MN15I14 | JN88496                 | 19330-36579 | AM105M02 | GQ478572                |
| Vm, Cp  | VmA3        | protein                            | 3               | 3  | 638                    | 648  | 687           | 351   | 78861-80185 | MN15I14 | JN88496                 | 38581-39580 | AM105M02 | GQ478572                |
| Vm, Cp  | VmA4        | otu-like cysteine type protease    | 4               | 4  | 990                    | 1030 | 5550          | 6217  | 82441-88980 | MN15I14 | JN88496                 | 41230-48477 | AM105M02 | GQ478572                |
| Vm, Cp  | VmA5        | mrna-decapping enzyme-like protein | 4               | 4  | 457                    | 479  | 2025          | 2142  | 91960-94441 | MN15I14 | JN88496                 | 50781-53402 | AM105M02 | GQ478572                |

**Table S4. Gene densities of the syntenic regions of the *C. papaya* and *V. monoica* BACs.**

| Species                                                | Sequence length (in kb) | Gene Density* (kb/1 gene) |
|--------------------------------------------------------|-------------------------|---------------------------|
| <i>V. monoica</i>                                      | 703                     | <b>46.9</b>               |
| <i>C. papaya</i> homologous region on the X chromosome | 1,820                   | <b>130</b>                |
| <i>V. monoica</i>                                      | 99                      | <b>19.80</b>              |
| <i>C.papaya</i> autosomal homologous region            | 37                      | <b>7.40</b>               |

\* Pseudogenes were excluded from the calculation of gene density.

**Table S5. The five blocks in which the *C. papaya* X-specific region is larger than the corresponding *V. monoica* region.**

| Block | Location in the <i>V. monoica</i> pseudomolecule | <i>V. monoica</i> expansion (bp) | Location in the <i>C. papaya</i> pseudomolecule | <i>C. papaya</i> expansion (bp) | Percent expansion on <i>C. papaya</i> X |
|-------|--------------------------------------------------|----------------------------------|-------------------------------------------------|---------------------------------|-----------------------------------------|
| 1     | 4,955-4,7967                                     | 43,012                           | 547-64,514                                      | 63,967                          | 32.8%                                   |
| 2     | 200,482-276,850                                  | 76,368                           | 380,431-558,631                                 | 178,200                         | 57.1%                                   |
| 3     | 319,495-385,985                                  | 66,490                           | 598,837-850,064                                 | 251,227                         | 73.5%                                   |
| 4     | 627,652-643,872                                  | 16,220                           | 1,502,467-1,539,407                             | 36,940                          | 56.1%                                   |
| 5     | 818,282-959,856                                  | 141,574                          | 2,013,403-2,279,781                             | 266,378                         | 46.9%                                   |

**Table S6. Repetitive element content of the *C. papaya* X-specific BACs and corresponding *V. monoica* BACs, as well as the *V. monoica* autosomal BAC and the *C. papaya* whole genome.**

| Sequence source            | <i>V. monoica</i> X region BACS (1,082,404 bp) |                         | <i>C. papaya</i> X-specific BACS (2,545,160 bp) |                         | <i>V. monoica</i> autosome BAC (101,746 bp) |                         | Complete papaya genome <sup>1</sup> (271,000,000 bp) |                         |
|----------------------------|------------------------------------------------|-------------------------|-------------------------------------------------|-------------------------|---------------------------------------------|-------------------------|------------------------------------------------------|-------------------------|
| Repeat class/family        | Length occupied (bp)                           | Percentage of sequences | Length occupied (bp)                            | Percentage of sequences | Length occupied (bp)                        | Percentage of sequences | Length occupied (bp)                                 | Percentage of sequences |
| Retroelements <sup>2</sup> | 351,499                                        | 32.5%                   | 1,181,757                                       | 46.4%                   | 28,622                                      | 28.1%                   | 115,601,100                                          | 42.7%                   |
| LINEs                      | 15,266                                         | 1.4%                    | 21,724                                          | 0.9%                    | 7,644                                       | 7.5%                    | 2,700,000                                            | 1.0%                    |
| LTR elements               | 336,233                                        | 31.1%                   | 1,160,033                                       | 45.6%                   | 20,978                                      | 20.6%                   | 90,900,000                                           | 33.5%                   |
| DNA transposons            | 11,548                                         | 1.1%                    | 2,371                                           | 0.1%                    | 701                                         | 0.7%                    | 534,200                                              | 0.2%                    |
| Unclassified               | 286,822                                        | 26.5%                   | 480,122                                         | 18.9%                   | 32,469                                      | 31.9%                   | 24,298,200                                           | 9.0%                    |
| Total interspersed repeats | 649,869                                        | 60.0%                   | 1,664,250                                       | 65.4%                   | 61,792                                      | 60.7%                   | 140,433,500                                          | 51.8%                   |
|                            |                                                |                         |                                                 |                         |                                             |                         |                                                      |                         |

<sup>1</sup>Papaya genome repetitive element values were obtained from Ming et al. (2008).

<sup>2</sup>Retroelement totals include SINEs and Others as well as LTRs and LINEs.

**Table S7. Repetitive element content of the *C. papaya* X-specific BACs.**

| <i>C. papaya</i> BAC ID          | BAC size (bp) | Total Repeats | Percentage of repetitive elements |
|----------------------------------|---------------|---------------|-----------------------------------|
| <i>C. papaya</i> X-specific BACs |               |               |                                   |
| contig08318                      | 10,102        | 1,664         | 16.47%                            |
| contig11941                      | 163,794       | 88,598        | 54.09%                            |
| SH23D15                          | 19,615        | 1,511         | 7.70%                             |
| SH49A07                          | 202,700       | 112,384       | 55.44%                            |
| SH50M24                          | 144,145       | 142,546       | 98.89%                            |
| SH51A03                          | 183,721       | 169,862       | 92.46%                            |
| SH53E18                          | 251,868       | 156,259       | 62.04%                            |
| SH54M13                          | 215,667       | 186,841       | 86.63%                            |
| SH54M22                          | 167,852       | 77,269        | 46.03%                            |
| SH55B21                          | 197,783       | 132,471       | 66.98%                            |
| SH65C15                          | 153,279       | 127,473       | 83.16%                            |
| SH69D24                          | 143,655       | 83,279        | 57.97%                            |
| SH79M13                          | 153,099       | 110,711       | 72.31%                            |
| SH80F18                          | 182,686       | 108,373       | 59.32%                            |
| SH84J07                          | 222,249       | 106,359       | 47.86%                            |
| SH86B15                          | 182,222       | 89,558        | 49.15%                            |
| SH93K15                          | 185,581       | 101,727       | 54.82%                            |
| AM136D11                         | 89,095        | 70,606        | 79.25%                            |
| Autosomal BAC                    |               |               |                                   |
| DM105M02                         | 72,846        | 16,226        | 22.27%                            |



**Table S8. Repetitive element contents of individual *V. monoica* BACs.**

| <i>V. monoica</i><br>BAC ID                                  | BAC size (bp) | Total Repeats | Percentage of<br>repetitive elements |
|--------------------------------------------------------------|---------------|---------------|--------------------------------------|
| BACs corresponding to the <i>C. papaya</i> X-specific region |               |               |                                      |
| MN07P01                                                      | 98,296        | 64,289        | 65.40%                               |
| MN13O12                                                      | 106,282       | 22,079        | 20.77%                               |
| MN20D10                                                      | 102,599       | 64,450        | 62.82%                               |
| MN25J07                                                      | 99,658        | 67,121        | 67.35%                               |
| MN30L07                                                      | 89,446        | 28,021        | 31.33%                               |
| MN67D07                                                      | 107,683       | 92,084        | 85.51%                               |
| MN74M10                                                      | 95,940        | 70,831        | 73.83%                               |
| MN81D10                                                      | 96,388        | 58,140        | 60.32%                               |
| MN82C19                                                      | 99,325        | 40,400        | 40.67%                               |
| MN86B21                                                      | 92,495        | 68,799        | 74.38%                               |
| MN96C09                                                      | 94,292        | 74,655        | 79.17%                               |
| Total                                                        | 108,2404      | 650,869       | 60.13%                               |
| Autosomal BAC                                                |               |               |                                      |
| MN15I14                                                      | 101,746       | 62,126        | 61.06%                               |

**Table S9. Estimated age of divergence of the genes shared by the *C. papaya* HSY, X, and *V. monoica* in regions of synteny.**

| Gene ID                  | Silent Sites |           | Silent mutations |           | Silent divergence ( $K_{sil}$ ) |           | Estimated age (MYA) |           | Average Estimated Age (MYA) $\pm$ (SD) |                        |
|--------------------------|--------------|-----------|------------------|-----------|---------------------------------|-----------|---------------------|-----------|----------------------------------------|------------------------|
|                          | Vm vs X      | Vm vs HSY | Vm vs X          | Vm vs HSY | Vm vs X                         | Vm vs HSY | Vm vs X             | Vm vs HSY | Vm vs X                                | Vm vs HSY              |
| CpXY <sup>h5</sup>       | 2,560.92     | 2,547.75  | 309              | 328       | 0.132                           | 0.141     | 16.450              | 17.675    | 21.439*<br>$\pm$ 2.988                 | 21.677*<br>$\pm$ 3.648 |
| CpXY <sup>h8</sup>       | 9,396.75     | 9,310.67  | 1,487            | 1,469     | 0.178                           | 0.177     | 22.220              | 22.145    |                                        |                        |
| CpXY <sup>h12</sup>      | 1,827.5      | 1,819.5   | 237              | 237       | 0.142                           | 0.143     | 17.798              | 17.884    |                                        |                        |
| CpXY <sup>h27</sup>      | 3,579.75     | 3,581.5   | 476              | 488       | 0.147                           | 0.151     | 18.318              | 18.818    |                                        |                        |
| CpXY <sup>h34</sup>      | 7,525.25     | 7,303.33  | 1,332            | 1,207     | 0.202                           | 0.187     | 25.250              | 23.336    |                                        |                        |
| CpXY <sup>h35</sup>      | 647.75       | 651.58    | 121              | 122       | 0.215                           | 0.215     | 26.854              | 26.926    |                                        |                        |
| CpXY <sup>h36</sup>      | 1,673.33     | 1,688.83  | 275              | 296       | 0.186                           | 0.200     | 23.188              | 24.954    |                                        |                        |
| <b>Vm vs Cp autosome</b> |              |           |                  |           |                                 |           |                     |           |                                        |                        |
| VmA3                     | 480.17       |           | 78               |           | 0.184                           |           | 23.051              |           | 23.181 $\pm$ 0.886                     |                        |
| VmA4                     | 5,074.42     |           | 863              |           | 0.193                           |           | 24.125              |           |                                        |                        |
| VmA5                     | 2,003.83     |           | 319              |           | 0.179                           |           | 22.368              |           |                                        |                        |

\*The average age was estimated only to easily compare the X and HSY  $K_{sil}$  and does not reflect an accurate divergence time. See the autosomal average estimated age for the divergence time between *V. monoica* and *C. papaya*

**Table S10.** Total numbers of mutations and  $K_a/K_s$  values for 5 pairs of transcripts shared between *V. monoica* (Vm), the papaya X-specific region (X), and the papaya HSY-specific region (HSY), as well as for 5 gene pairs compared between the *V. monoica* and papaya autosomal BACs.

| Gene ID                  | No. Sites (bp) |           |                             |           | No. Mutations |           |               |           |               |           |                   |           | Ks      |           | Ka      |           | Ka/Ks   |           | Average Ka/Ks ± (SD) |               |
|--------------------------|----------------|-----------|-----------------------------|-----------|---------------|-----------|---------------|-----------|---------------|-----------|-------------------|-----------|---------|-----------|---------|-----------|---------|-----------|----------------------|---------------|
|                          | Total sites    |           | Total coding sites analyzed |           | Syn sites     |           | Non-Syn sites |           | Syn mutations |           | Non-Syn mutations |           |         |           |         |           |         |           |                      |               |
|                          | Vm vs X        | Vm vs HSY | Vm vs X                     | Vm vs HSY | Vm vs X       | Vm vs HSY | Vm vs X       | Vm vs HSY | Vm vs X       | Vm vs HSY | Vm vs X           | Vm vs HSY | Vm vs X | Vm vs HSY | Vm vs X | Vm vs HSY | Vm vs X | Vm vs HSY |                      |               |
| CpXY <sup>h5</sup>       | 3,319          | 3,319     | 804                         | 801       | 190.58        | 188.42    | 613.42        | 612.58    | 31            | 34        | 27                | 34        | 0.183   | 0.209     | 0.045   | 0.057     | 0.247   | 0.273     | 0.220 ± 0.089        | 0.227 ± 0.092 |
| CpXY <sup>h20</sup>      | 38,230         | 38,230    | 6,600                       | 6,600     | 1490.08       | 1488.75   | 5109.92       | 5111.25   | 209           | 203       | 265               | 261       | 0.155   | 0.151     | 0.054   | 0.053     | 0.347   | 0.350     |                      |               |
| CpXY <sup>h34</sup>      | 17,805         | 17,805    | 1,410                       | 1,410     | 311.92        | 313.00    | 1098.08       | 1097.00   | 54            | 54        | 41                | 42        | 0.195   | 0.194     | 0.038   | 0.039     | 0.194   | 0.200     |                      |               |
| CpXY <sup>h35</sup>      | 1,196          | 1,196     | 813                         | 813       | 187.33        | 187.33    | 625.67        | 625.67    | 39            | 39        | 31                | 31        | 0.244   | 0.244     | 0.051   | 0.051     | 0.210   | 0.210     |                      |               |
| CpXY <sup>h36</sup>      | 2,776          | 2,776     | 1,143                       | 1,143     | 268.33        | 268.33    | 874.67        | 874.67    | 53            | 53        | 20                | 20        | 0.229   | 0.229     | 0.023   | 0.023     | 0.101   | 0.101     |                      |               |
| <b>Vm vs Cp autosome</b> |                |           |                             |           |               |           |               |           |               |           |                   |           |         |           |         |           |         |           |                      |               |
| CYC-b                    | 1,485          |           | 1,308                       |           | 308.5         |           | 999.5         |           | 65.83         |           | 51.17             |           | 0.251   |           | 0.053   |           | 0.211   |           | 0.205 ± 0.07         |               |
| VmA2                     | 1,915          |           | 1,191                       |           | 286.83        |           | 904.17        |           | 37.75         |           | 39.25             |           | 0.145   |           | 0.045   |           | 0.309   |           |                      |               |
| VmA3                     | 1,323          |           | 624                         |           | 152.42        |           | 471.58        |           | 51            |           | 24                |           | 0.443   |           | 0.053   |           | 0.119   |           |                      |               |
| VmA4                     | 6,540          |           | 987                         |           | 231.5         |           | 755.5         |           | 40            |           | 25                |           | 0.196   |           | 0.034   |           | 0.172   |           |                      |               |
| VmA5                     | 2,482          |           | 456                         |           | 98.08         |           | 348.92        |           | 23            |           | 20                |           | 0.281   |           | 0.060   |           | 0.212   |           |                      |               |

**Table S11. NCBI accession numbers of the *V. monoica* and *C. papaya* BACs.**

| <b><i>Vasconcellea monoica</i> BACs</b> | <b>Accession numbers</b> |
|-----------------------------------------|--------------------------|
| MN07P01                                 | JN88494                  |
| MN13O12                                 | JN088495                 |
| MN15I14                                 | JN88496                  |
| MN20D10                                 | JN088497                 |
| MN25J07                                 | JN088499                 |
| MN30L07                                 | JN088501                 |
| MN67D07                                 | JN088502                 |
| MN74M10                                 | JN088503                 |
| MN81D10                                 | JN088505                 |
| MN82C19                                 | JN088506                 |
| MN86B21                                 | JN088507                 |
| MN96C09                                 | JN088508                 |
|                                         |                          |
| <b><i>Carica papaya</i> BACs</b>        | <b>Accession numbers</b> |
| SH05K22                                 | AC239135                 |
| SH23D15                                 | AC239144                 |
| SH23L24                                 | AC238593                 |
| SH49A07                                 | AC239150                 |
| SH50M24                                 | JN088493                 |
| SH51A03                                 | AC238603                 |
| SH53E18                                 | EF661026                 |
| SH53G04                                 | AC238607                 |
| SH54M13                                 | AC238609                 |
| SH54M22                                 | AC239202                 |
| SH55B21                                 | FJ429367                 |
| SH59O17                                 | AC239154                 |
| SH64O06                                 | AC239158                 |
| SH65C15                                 | AC239160                 |
| SH69D24                                 | AC239162                 |
| SH69E13                                 | AC238619                 |
| SH75H06                                 | AC238771                 |
| SH79M13                                 | AC239204                 |
| SH80F18                                 | AC238626                 |
| SH81O12                                 | AC239165                 |
| SH84J07                                 | AC238629                 |
| SH86B15                                 | AC239167                 |
| SH93K15                                 | AC239170                 |
| AM105M02                                | GQ478572                 |
| AM136D11                                | AC239253                 |

**Table S12. Sizes of the syntenic regions of the *C. papaya* X-specific region compared to the corresponding *V. monoica* region, as well as the *C. papaya* autosomal region compared with the corresponding *V. monoica* autosomal region.**

|                                 | <i>C. papaya</i><br>syntenic<br>region (bp) | <i>V. monoica</i><br>syntenic region<br>(bp) | Percent<br>expansion in<br><i>C. papaya</i> X | Percent<br>expansion in<br><i>V. monoica</i> |
|---------------------------------|---------------------------------------------|----------------------------------------------|-----------------------------------------------|----------------------------------------------|
| X chromosome                    |                                             |                                              |                                               |                                              |
| Block 1                         | 900,826                                     | 499,232                                      | 45%                                           |                                              |
| Block 2                         | 571,348                                     | 250,963                                      | 56%                                           |                                              |
| Block 3                         | 28,672                                      | 30,057                                       |                                               | 5%                                           |
| Total expansion of the X region | 1,500,846                                   | 780,252                                      | 48%                                           |                                              |
| Autosome                        |                                             |                                              |                                               |                                              |
| Block 1                         | 37,180                                      | 98,904                                       |                                               | 62%                                          |
